# Supplementary material
Source: publisher figshare collection journal article supplement (https://acs.figshare.com/ndownloader/files/3832555)
Supplement: Supplementary file 1 [file 3832555]

Supporting information for:

**Glycosphingolipids Enhance Bacterial Attachment and Fouling of NF**

**Membranes**

Robert Haas<sup>1,3</sup>, Jenia Gutman<sup>1</sup>, Nathaniel C. Wardrip<sup>1</sup>, Kazuyoshi Kawahara<sup>2</sup>,

Wolfgang Uhl<sup>3,4</sup>, Moshe Herzberg<sup>1</sup>, and Christopher J. Arnusch<sup>1\*</sup>

<sup>1</sup> *Department of Desalination and Water Treatment, Zuckerberg Institute for Water Research, Jacob Blaustein Institutes for Desert Research, Ben-Gurion University of the Negev, Sede-Boqer Campus 84990, Israel*

<sup>2</sup> *Department of Biosciences, College of Science and Engineering, Kanto Gakuin University, Yokohama, Japan*

<sup>3</sup> *Chair of Water Supply Engineering, Technische Universität Dresden, 01062 Dresden, Germany*

<sup>4</sup> *Norwegian Institute for Water Research (NIVA), 0349 Oslo, Norway*

**\*Corresponding author:** Tel. 972-8-656-3532, Fax. 972-8-656-3503, e-mail:

[arnusch@bgu.ac.il](mailto:arnusch@bgu.ac.il)

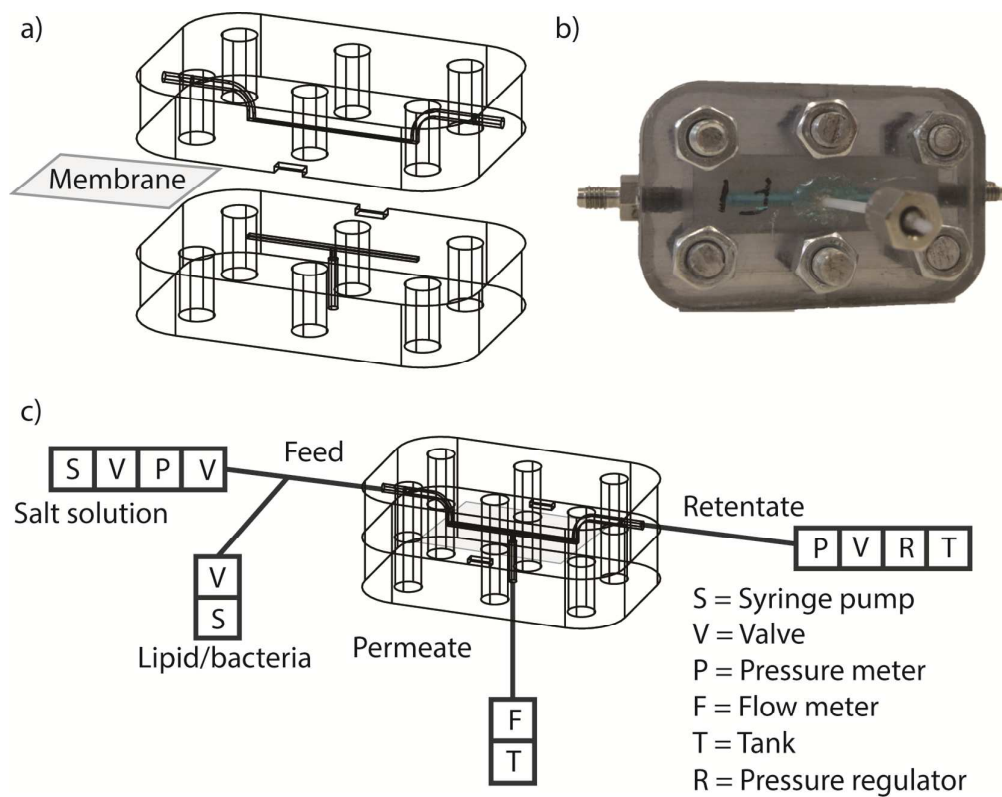

**Figure S1:** Apparatus set up. a) Schematic of washed membrane placed in the flow cell. b) Actual picture of the flow cell with membrane inside. Pictured is the permeate side (tubing fastened using epoxy), and feed entrance and exit holes were threaded. c) Schematic representation of the apparatus set-up, including syringe pumps (S), valves (V), pressure meters (P), flow meters (F), collection tanks (T), and pressure regulator (R).
